# Supplementary material for: EGFR-mediated activation of adipose tissue macrophages promotes obesity and insulin resistance
Source: PubMed Central journal article supplement (PMC9365849; doi:10.1038/s41467-022-32348-3), 2022-08-10
Supplement: 41467_2022_32348_MOESM1_ESM.pdf [file 41467_2022_32348_MOESM1_ESM.pdf]

**Supplemental Appendix, Table 1.** List of primers for genotyping.

| Alleles/Transgenes | Primer                                                                                                                                                                       |
|--------------------|------------------------------------------------------------------------------------------------------------------------------------------------------------------------------|
| Waved 2            | wave2-F: 5'-ATAACCTGACACTTGTTCAGAGTAC-3'<br>wave2-R: 5'-TTTGCAATCTGCACACACCAGTTG-3'                                                                                          |
| EGFR-flox          | EGFR-S: 5'-CTTTGGAGAACCTGCAGATC-3'<br>EGFR-AS: 5'-CTGCTACTGGCTCAAGTTTC-3'                                                                                                    |
| CD11b-Cre          | CD11b-CreF: 5'-AATGCTTCTGTCCGTTTGC-3'<br>CD11b-CreR: 5'-CGGCAACACCATTTTTTCTG-3'                                                                                              |
| ACTA1-Cre          | oIMR1084: 5'-GCGGTCTGGCAGTAAAACTATC-3'<br>oIMR1084: 5'-GTGAAACAGCATTGCTGTCACTT-3'<br>oIMR 7338: 5'-CTAGGCCACAGAATTGAAAGATCT-3'<br>oIMR 7339: 5'-GTAGGTGGAAATTCTAGCATCATCC-3' |
| Adipoq-Cre         | Adipoq-CreF: 5'-ACGGACAGAAGCATTTTCCA-3'<br>Adipoq-CreR: 5'-GGATGTGCCATGTGAGTCTG-3'                                                                                           |
| Alb1-Cre           | Albumin-CreF: 5'-ACCTGAAGATGTTTCGCGATTATCT-3'<br>Albumin-CreR: 5'-ACCGTCAGTACGTGAGATATCTT-3'                                                                                 |
| AREG-/-            | AR F1M: 5'-CTTTCCAGCTTTTCTCCACCTCAAG -3'<br>AR R1M: 5'-ACAGTAACCTCTGTTGCATGCCAC-3'<br>PGK2: 5'-CTGCACGAGACTAGTGAGACGTGC-3'                                                   |

**Supplemental Appendix, Table 2.** List of antibody, source, application and dilution

| Antibody                         | Catalog Number                | Dilution            |
|----------------------------------|-------------------------------|---------------------|
| Goat anti-EGFR                   | Sigma, E1281                  | IF 1:50             |
| Rabbit anti-Amphiregulin         | Abcam, ab234750               | WB 1:1000; IF 1:100 |
| Rabbit anti-Perilipin-1          | Cell signal technology, 9349  | IF 1:100            |
| Rabbit anti-IL-1 $\beta$         | Abcam, ab9722                 | IF 1:100            |
| Rabbit anti-Ki67                 | Abcam, ab16667                | IF 1:300            |
| Rat anti-F4/80                   | Bio-Rad, MCA497R              | IF 1:50             |
| Rabbit anti-CD68                 | Abcam, ab125212               | IF 1:100            |
| Rabbit anti-CD206                | Proteintech, 18704-1-AP       | IF 1:100            |
| Rabbit anti-Arginase 1           | Novus biologicals, NBP1-32731 | IF 1:100            |
| Rabbit anti-p-AKT                | Cell signal technology, 4046  | WB 1:1000; IF 1:100 |
| Rabbit anti-AKT                  | Cell signal technology, 4685  | WB 1:1000           |
| Mouse anti- $\alpha$ -Tubulin    | Cell signal technology, 3873  | WB 1:2000           |
| Mouse anti-TNF- $\alpha$         | Santa Cruz, SC-133192         | IF 1:50             |
| Rabbit anti-CX3CR1               | Abcam, ab8021                 | IF 1:100            |
| Anti-mouse CD45 (30-F11)         | Biolegend 103149              | FC 0.2 mg/ml        |
| Anti-mouse/human CD11b (M1/70)   | Biolegend 101226              | FC 0.2 mg/ml        |
| Anti-mouse F4/80 (BM8)           | Biolegend 123130              | FC 0.2 mg/ml        |
| Purified anti-mouse CD16/32 (93) | Biolegend 101302              | FC 0.2 mg/ml        |
| Anti-mouse CD170 (1RNM44N)       | eBioscience, 56170280         | FC 0.2 mg/ml        |
| Anti-mouse Ly-6G (1A8)           | Biolegend 127614              | FC 0.2 mg/ml        |
| Anti-mouse CD9 (MZ3)             | Biolegend 124808              | FC 0.2mg/ml         |
| Anti-mouse CD64 (X54-5/7.1)      | Biolegend 139308              | FC 0.2mg/ml         |
| Anti-mouse CD170 (S17007L)       | Biolegend 155506              | FC 0.2mg/ml         |
| Anti-mouse CD8a (53-6.7)         | Biolegend 100708              | FC 0.2mg/ml         |
| Anti-mouse CD19 (6D5)            | Biolegend 115508              | FC 0.2mg/ml         |
| Anti-mouse CD3e (145-2C11)       | Biolegend 100308              | FC 0.2mg/ml         |
| Anti-mouse Ly6c (HK 1.4)         | Biolegend, 128024             | FC 0.2mg/ml         |
| Rabbit anti-CD9                  | ThermoFisher, MA531980        | IF 1:50             |

**Supplemental Appendix, Table 3.** List of gene probes (Applied Biosystems)

| Mouse primer  | Catalog Number |
|---------------|----------------|
| <i>Emr1</i>   | Mm00802529     |
| <i>Cd68</i>   | Mm03047343     |
| <i>Tnf</i>    | Mm99999068     |
| <i>Il1b</i>   | Mm00434228     |
| <i>Il6</i>    | Mm00446190     |
| <i>Ccl2</i>   | Mm00441242     |
| <i>Col1a1</i> | Mm00801666     |
| <i>Col3a1</i> | Mm01254476     |
| <i>Col4a1</i> | Mm01210125     |
| <i>Acta2</i>  | Mm01546133     |
| <i>Tgfb1</i>  | Mm00441726     |
| <i>Ctgf</i>   | Mm01192933     |
| <i>Nos2</i>   | Mm00440502     |
| <i>Cd206</i>  | Mm01329362     |
| <i>Arg1</i>   | Mm00475991     |
| <i>Il4ra</i>  | Mm01275139     |
| <i>Cd209</i>  | Mm00460067     |
| <i>Ccl2</i>   | Mm00441242     |
| <i>Ccl3</i>   | Mm00441258     |
| <i>Ccr1</i>   | Mm01216147     |
| <i>Ccr2</i>   | Mm01216173     |
| <i>Ccr5</i>   | Mm04207879     |
| <i>Cx3cl1</i> | Mm00436454     |
| <i>Cxcl12</i> | Mm00445553     |
| <i>Cxcl1</i>  | Mm04207460     |
| <i>Cxcl2</i>  | Mm00436450     |
| <i>Cx3cr1</i> | Mm00438354     |
| <i>Cxcr4</i>  | Mm01292123     |
| <i>Egfr</i>   | Mm00433023     |
| <i>ErbB2</i>  | Mm00658541     |
| <i>ErbB3</i>  | Mm01159999     |
| <i>ErbB4</i>  | Mm01256793     |
| <i>Egf</i>    | Mm01316968     |
| <i>Tgf a</i>  | Mm00446232     |
| <i>Hb-egf</i> | Mm00439307     |
| <i>Areg</i>   | Mm00437583     |
| <i>Btc</i>    | Mm00432137     |
| <i>Ereg</i>   | Mm00514794     |
| <i>Epgn</i>   | Mm00504344     |
| <i>Lep</i>    | Mm00434759     |
| <i>Adipoq</i> | Mm00456425     |
| <i>Hif1a</i>  | Mm00468869     |
| <i>Pgk1</i>   | Mm00435617     |
| <i>Ldha</i>   | Mm01612132     |

---

|              |            |
|--------------|------------|
| <i>Glut1</i> | Mm00441477 |
| <i>Hk1</i>   | Mm00439344 |
| <i>Pkm</i>   | Mm00834102 |
| <i>Pfdb3</i> | Mm00504650 |
| <i>Ucp1</i>  | Mm01244861 |
| <i>Acta2</i> | Mm01546133 |
| <i>Irf5</i>  | Mm00496477 |
| <i>Il23a</i> | Mm00518984 |
| <i>Ym1</i>   | Mm00657889 |
| <i>Fizz1</i> | Mm00445109 |

---

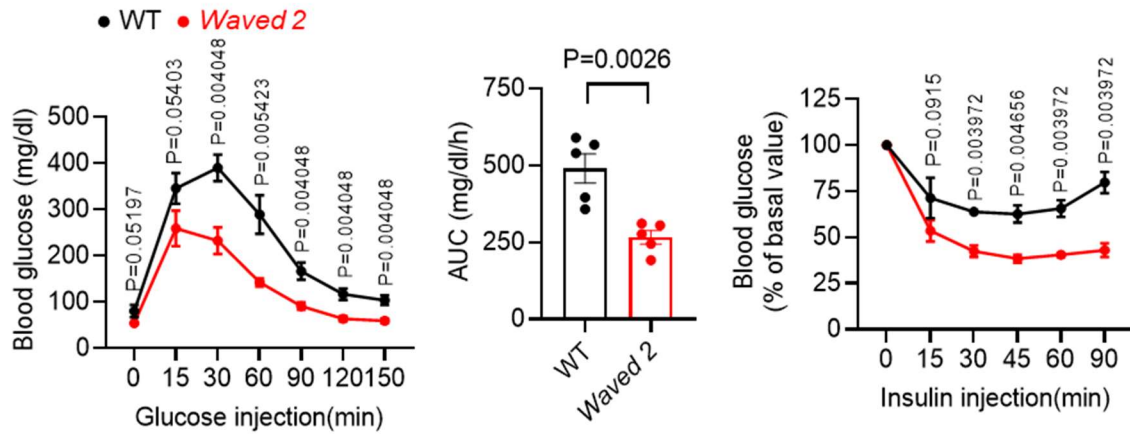

**Supplementary Figure 1. Female *Waved 2* mice developed less insulin resistance in diet-induced obesity.** Female *Waved 2* mice with intrinsic EGFR tyrosine kinase deficiency and WT mice were fed the HFD for 12 weeks. Female *Waved 2* mice had improved glucose tolerance test (GTT, n=5) and insulin tolerance test (ITT, n=3).

Data are means  $\pm$  SEM, analyzed using 2 tailed Student's t test and 2-way ANOVA followed by Tukey's post hoc test for GTT and 2-way ANOVA followed by Tukey's post hoc test for ITT.

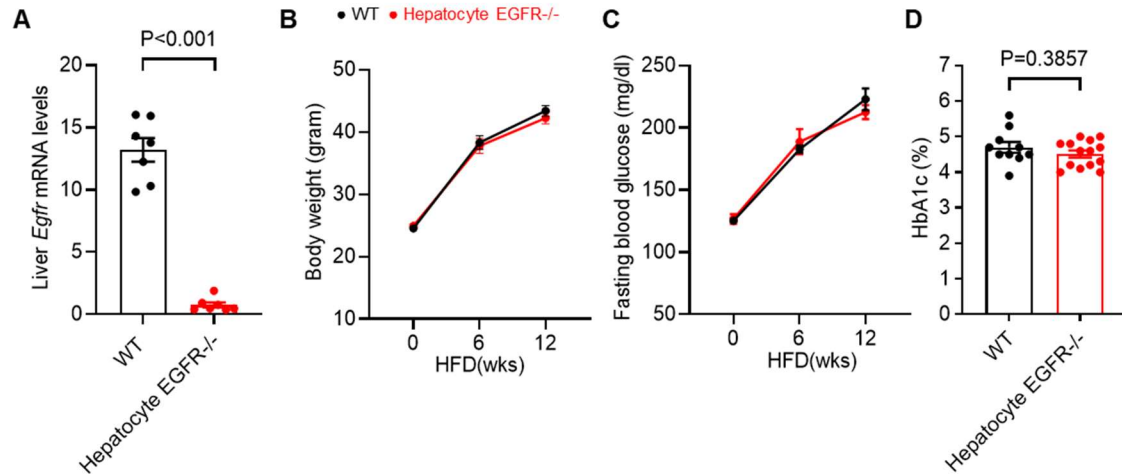

**Supplementary Figure 2. Selective EGFR deletion in hepatocytes had no effect on insulin resistance in diet-induced obesity.** Male hepatocyte EGFR<sup>-/-</sup> (Alb1-Cre; EGFR<sup>fl/fl</sup>) mice and WT (EGFR<sup>fl/fl</sup>) mice were fed with the HFD for 12 weeks. **(A)** Hepatocyte EGFR<sup>-/-</sup> mice had markedly lower liver *Egfr* mRNA levels compared to WT mice. N=7. **(B and C)** Hepatocyte EGFR<sup>-/-</sup> mice and WT mice had similar body weight gain **(B)** and fasting blood glucose **(C)** after the HFD treatment. N=10 and 14. **(D)** Hepatocyte EGFR<sup>-/-</sup> mice and WT mice had similar HbA1c at 12 weeks after the HFD. N= 10 and 14.

Data are means ± SEM, analyzed using 2 tailed Student's t test for **A** and **D**; 2-way ANOVA followed by Tukey's post hoc test for **B** and **C**.

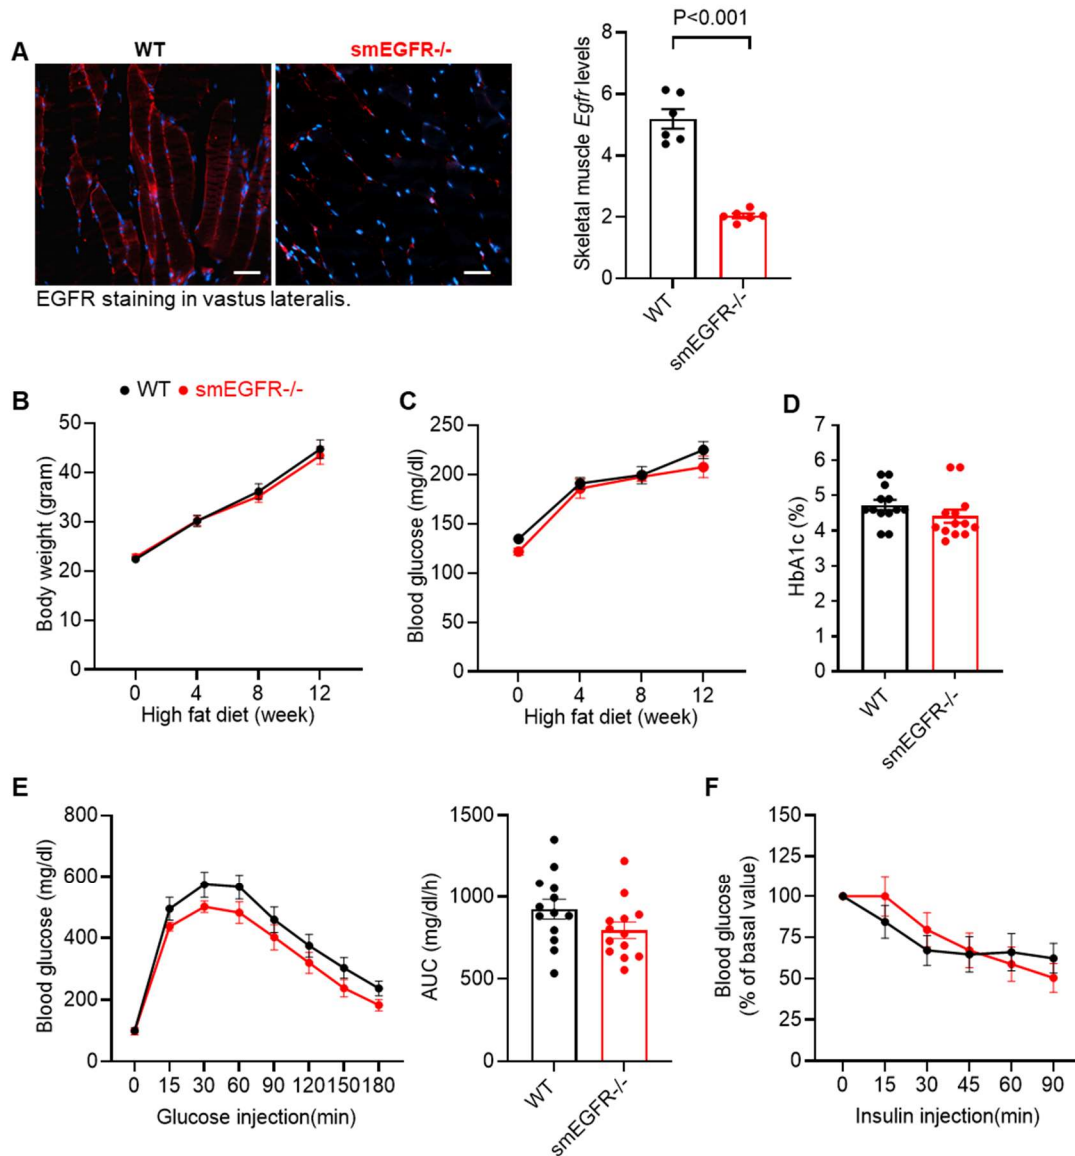

**Supplementary Figure 3. Selective deletion of EGFR in skeletal muscle had no effect on insulin resistance in diet induced obesity.** Male smEGFR<sup>-/-</sup> (ACTA1-Cre; EGFR<sup>fl/fl</sup>) mice and WT (EGFR<sup>fl/fl</sup>) mice were fed with the HFD for 12 weeks. **(A)** Both EGFR mRNA and protein levels in vastus lateralis were decreased in smEGFR<sup>-/-</sup> mice compared to WT mice. N=6. Scale bar=100μm. **(B-D)** smEGFR<sup>-/-</sup> mice and WT mice had similar body weight gain **(B)**, fasting blood glucose **(C)**, and HbA1c **(D)**. N=13. **(E and F)** smEGFR<sup>-/-</sup> mice and WT mice had similar glucose tolerance test (GTT, n=13) **(E)** and insulin tolerance test (ITT, n=7) **(F)**.

Data are means ± SEM, analyzed using 2 tailed Student's t test for **A and D**, 2-way ANOVA followed by Tukey's post hoc test for **B, C, and F**; and 2 tailed Student's t test and 2-way ANOVA followed by Tukey's post hoc test for **E**.

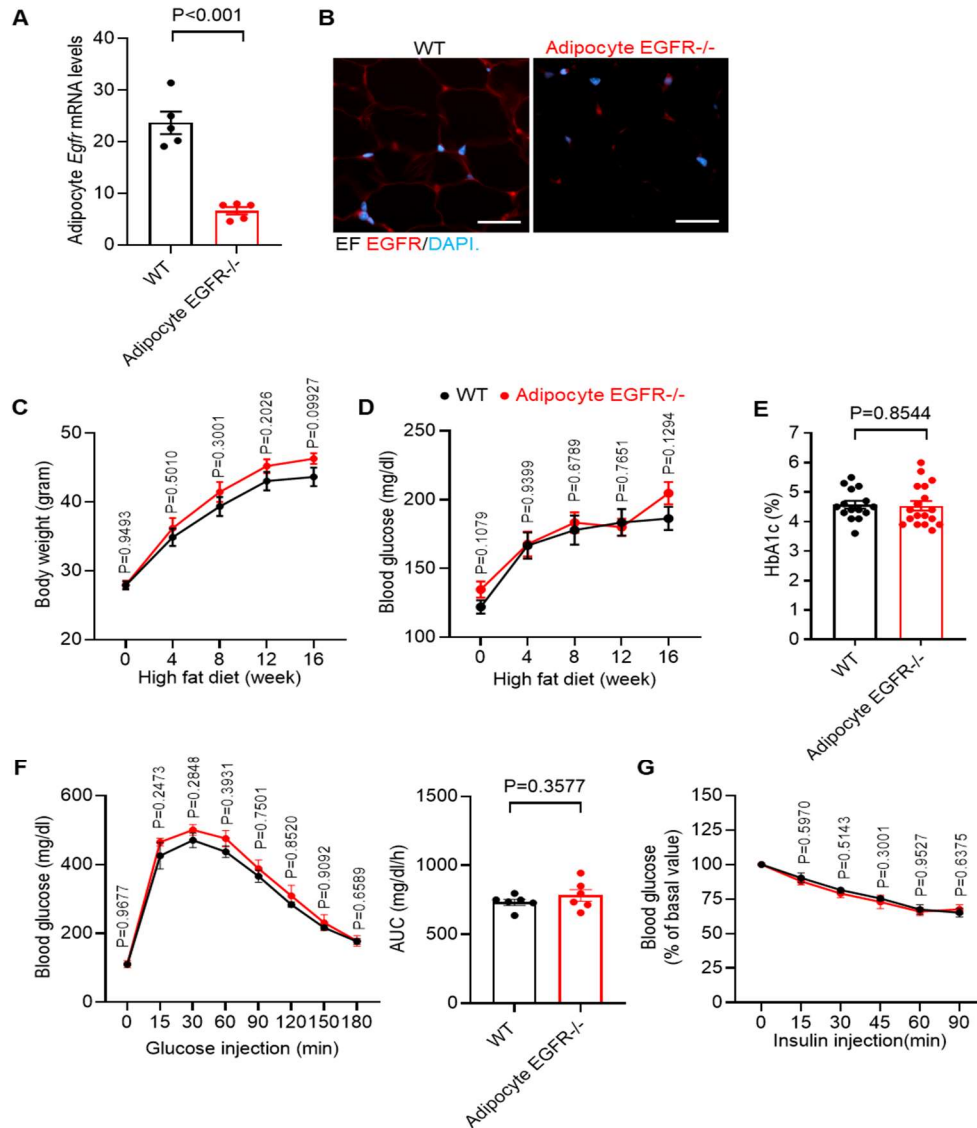

**Supplementary Figure 4. Selective deletion of EGFR in adipocytes in male mice had no effect on insulin resistance in diet induced obesity.** Male Adipocyte EGFR<sup>-/-</sup> (Adipoq-Cre; EGFR<sup>fl/fl</sup>) mice and WT (EGFR<sup>fl/fl</sup>) mice were fed with the HFD for 16 weeks. (**A and B**) EF EGFR mRNA (**A**) and protein (**B**) expression was markedly decreased in adipocyte EGFR<sup>-/-</sup> mice compared to WT mice. N=5. Scale bar=100 $\mu$ m. (**C-E**) Adipocyte EGFR<sup>-/-</sup> mice and WT mice had similar body weight gain (n=15) (**C**), fasting blood glucose (n=15) (**D**), and HbA1c (N=15 and 17) (**E**). (**F and G**) Adipocyte EGFR<sup>-/-</sup> mice and WT mice had similar glucose tolerance test (n=6 and 8) (**F**) and insulin tolerance test (n=6) (**G**).

Data are means  $\pm$  SEM, analyzed using 2 tailed Student's t test for **A** and **E**; 2-way ANOVA followed by Tukey's post hoc test for **C**, **D**, and **G**; and 2 tailed Student's t test and 2-way ANOVA followed by Tukey's post hoc test for **F**.



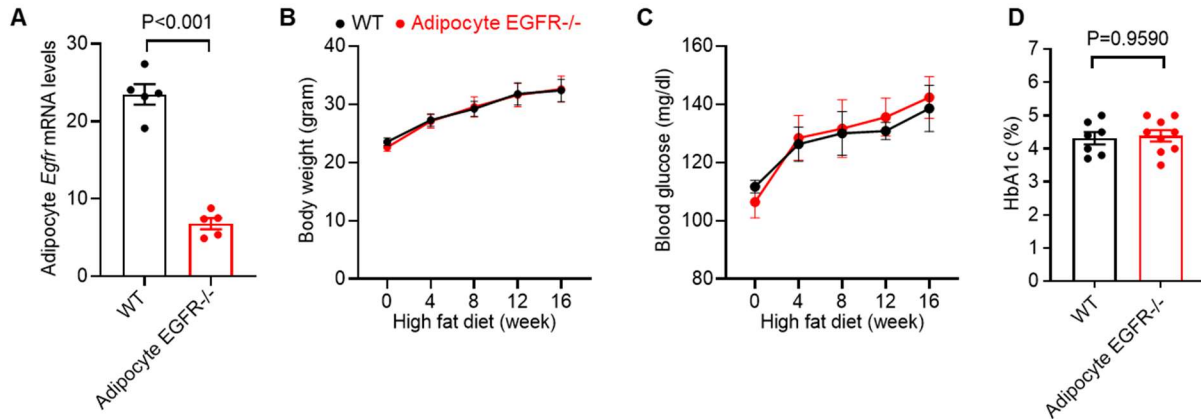

**Supplementary Figure 5. Selective deletion of EGFR in adipocytes in female mice had no effect on insulin resistance in diet induced obesity.** Female Adipocyte EGFR<sup>-/-</sup> (Adipoq-Cre; EGFR<sup>fl/fl</sup>) mice and WT (EGFR<sup>fl/fl</sup>) mice were fed with the HFD for 16 weeks. **(A)** Inguinal EGFR mRNA expression was markedly decreased in adipocyte EGFR<sup>-/-</sup> mice compared to WT mice. N=5. **(B-D)** Female adipocyte EGFR<sup>-/-</sup> mice and WT mice had similar body weight gain **(B)**, fasting blood glucose **(C)**, and HbA1c **(D)**. N=7 and 9.

Data are means ± SEM, analyzed using 2 tailed Student's t test for **A** and **D**, 2-way ANOVA followed by Tukey's post hoc test for **B** and **C**.

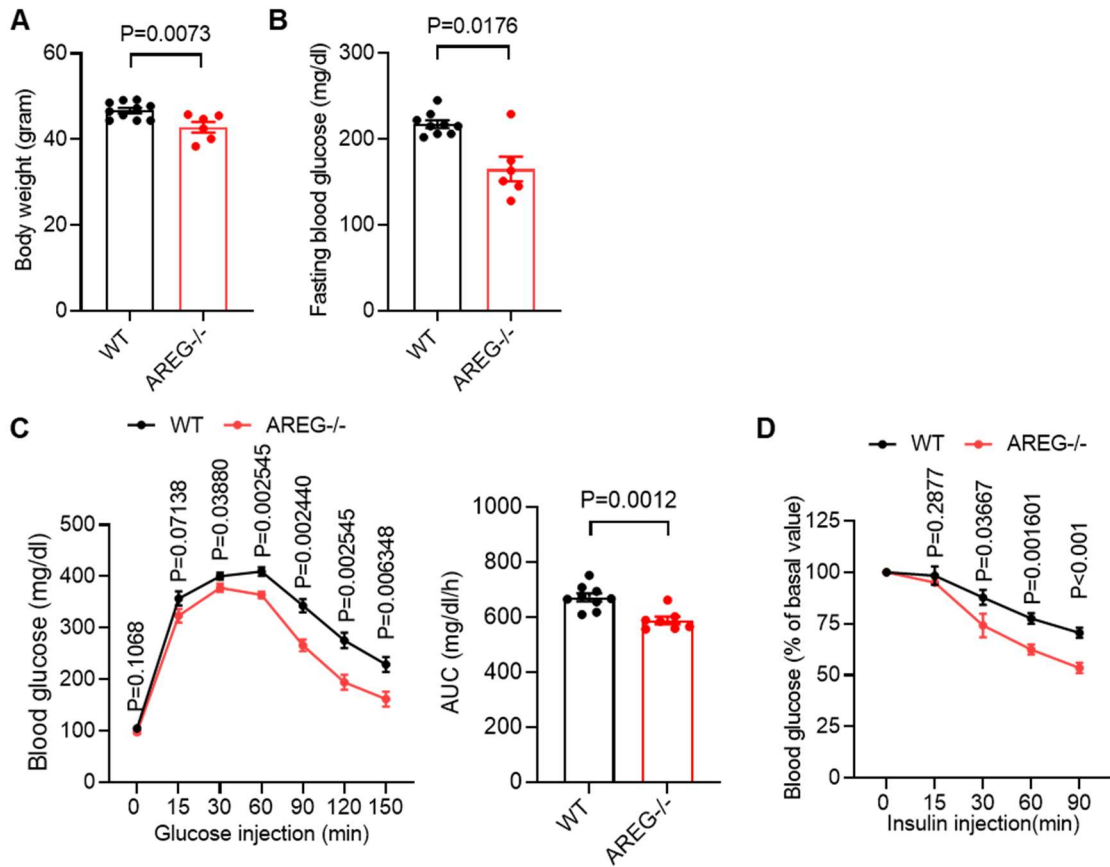

**Supplementary Figure 6. AREG deletion protected against insulin resistance in response to a high fat diet.** WT and global AREG<sup>-/-</sup> mice were fed with the HFD for 12 weeks. (**A** and **B**) Global AREG<sup>-/-</sup> mice had lower body weight (**A**) and lower fasting blood glucose (**B**). N=6 and 10. (**C** and **D**) Global AREG<sup>-/-</sup> mice had improved glucose tolerance (n=7 and 9) (**C**) and insulin tolerance (n=6 and 9) (**D**).

Data are means ± SEM, analyzed using 2 tailed Student's t test for **A** and **B**; 2 tailed Student's t test and 2-way ANOVA followed by Tukey's post hoc test for **C**; and 2-way ANOVA followed by Tukey's post hoc test for **D**.

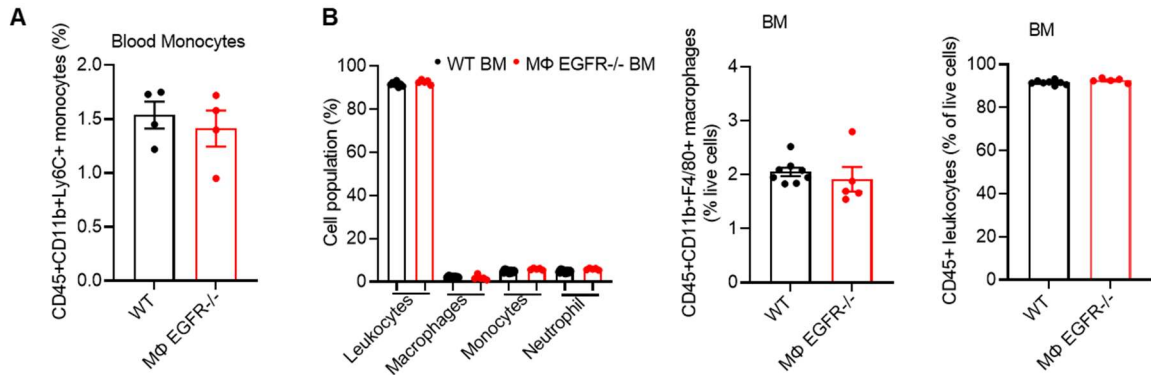

**Supplementary Figure 7.** Myeloid EGFR deletion had no effect on blood monocyte counts and bone marrow leukocyte composition. Control WT and MΦ EGFR<sup>-/-</sup> mice were used. **(A)** Flow cytometry determined no differences in the monocyte (CD45<sup>+</sup>; CD11b<sup>+</sup>; Ly6C<sup>+</sup>) population from peripheral blood isolated from WT and MΦ EGFR<sup>-/-</sup> mice. N=4. **(B)** Flow cytometry also confirmed no significant changes in leukocyte (CD45<sup>+</sup>), macrophage (CD45<sup>+</sup>; CD11b<sup>+</sup>; F4/80<sup>+</sup>), monocyte (CD45<sup>+</sup>; CD11b<sup>+</sup>; F4/80dim; Ly6C<sup>+</sup>), and neutrophil (CD45<sup>+</sup>; CD11b<sup>+</sup>; Ly6G<sup>+</sup>) bone marrow cell populations relative to total alive bone marrows cells. N=5 and 8.

Data are means ± SEM, analyzed using 2 tailed Student's t test.

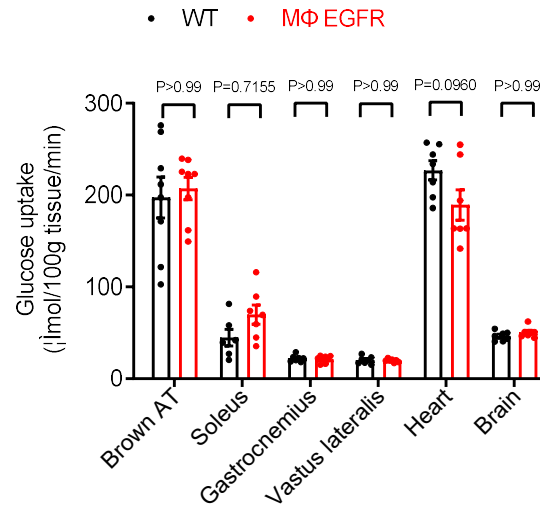

**Supplementary Figure 8. Myeloid EGFR deletion had no effect on glucose uptake in any tissues except for white adipose tissues in diet-induced obesity.** WT and myeloid EGFR<sup>-/-</sup> mice were on the HFD for 12 weeks, and hyperinsulinemic-euglycemic clamps were performed. Glucose uptake, a marker of insulin resistance, was comparable in brown AT, skeletal muscles (soleus, gastrocnemius, and vastus lateralis), and heart and brain.

Data are means  $\pm$  SEM, n=7 and 8, analyzed using 2 tailed Student's t test.

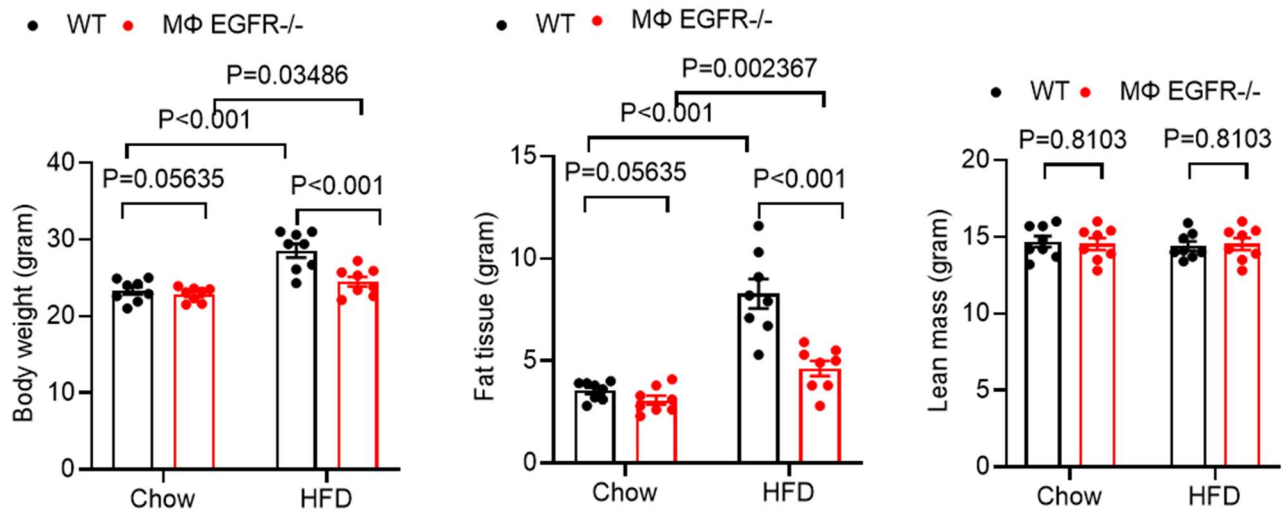

**Supplementary Figure 9.** High fat diet led to reduced fat mass increases in myeloid EGFR<sup>-/-</sup> mice. Body composition was determined by NMR in MΦ EGFR<sup>-/-</sup> mice and littermate WT mice with chow food and with HFD for 4 weeks. Body weight, fat tissue mass and lean mass were comparable between WT and MΦ EGFR<sup>-/-</sup> mice with chow food diet. HFD for 4 weeks led to less increased body weight and fat tissue mass in MΦ EGFR<sup>-/-</sup> mice compared to WT mice. N=8. Data are means ± SEM, analyzed using 2-way ANOVA followed by Bonferroni's post hoc test.

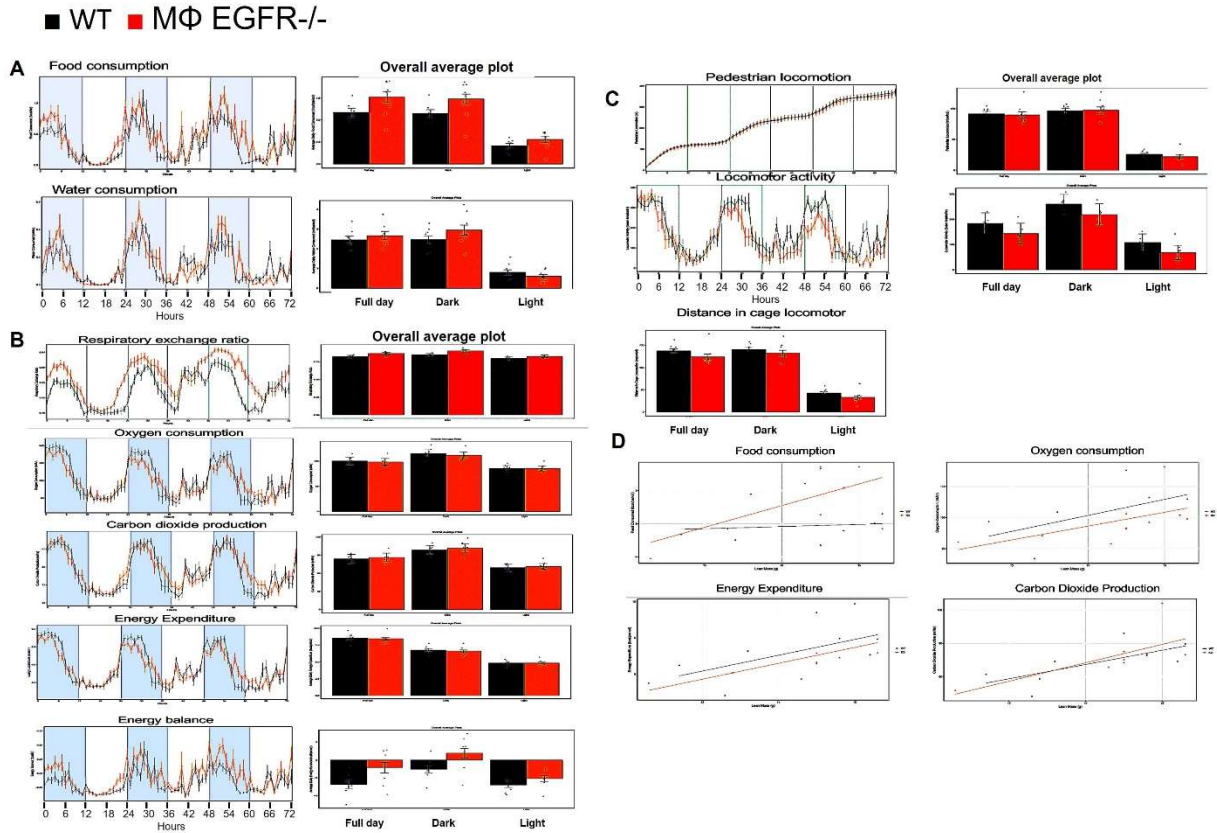

**Supplementary Figure 10.** WT and myeloid EGFR<sup>-/-</sup> mice had similar metabolic parameters on chow food diet. We assessed energy balance by indirect calorimetry experiment with Promethion Systems in WT and MΦ EGFR<sup>-/-</sup> mice fed chow food. **(A-C)** No differences were observed in food ingestion and circadian rhythm of feeding **(A)**, respiratory exchange ratio, oxygen consumption, carbon dioxide production, energy expenditure, energy balance **(B)**, ambulatory/pedestrian locomotion, locomotor activity, and distance in cage locomotor between WT mice and MΦ EGFR<sup>-/-</sup> mice **(C)**. Shaded areas indicate the dark photoperiod. Data are presented by mean  $\pm$  SEM; n=not significant, by 2-way ANOVA followed by Bonferroni's post hoc test, n=8 in each group. **(D)** Regression plot of food consumption, oxygen consumption, energy expenditure, and carbon dioxide production vs. lean mass. N=8, ANCOVA was used.

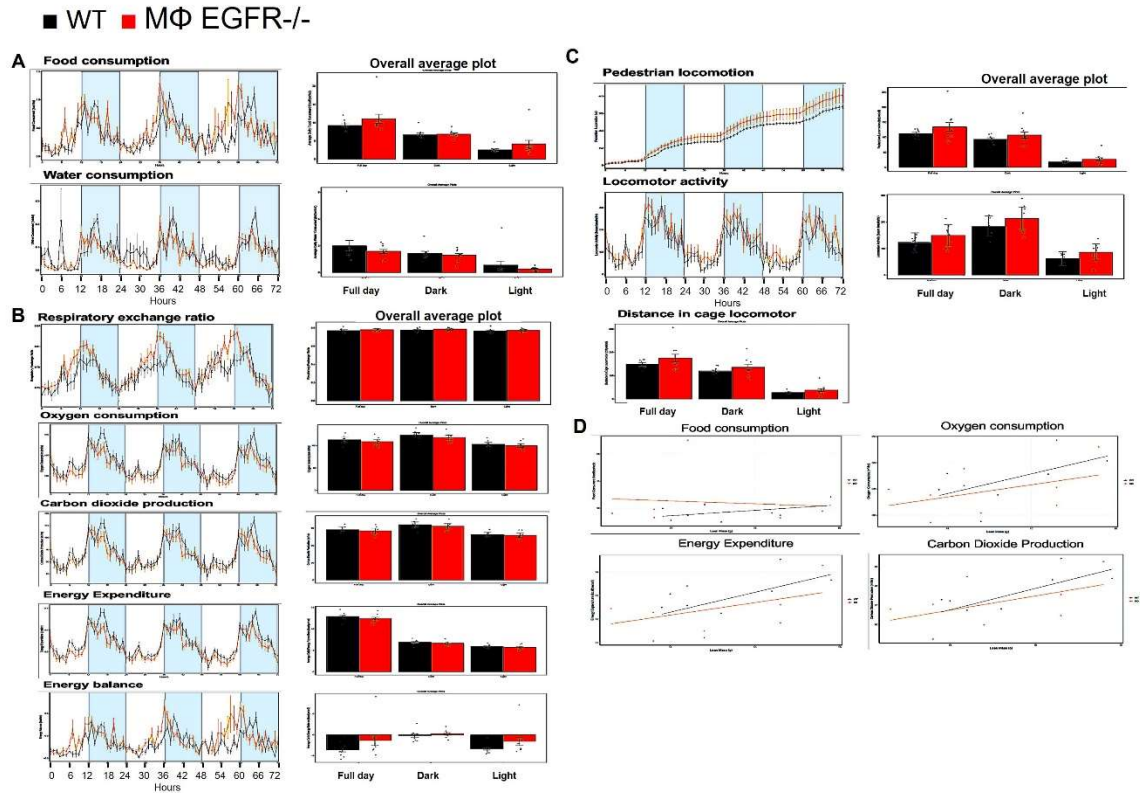

**Supplementary Figure 11.** WT and myeloid EGFR<sup>-/-</sup> mice had similar metabolic parameters after 4 weeks on the high fat diet. We assessed energy balance by indirect calorimetry experiment with Promethion Systems in WT and MΦ EGFR<sup>-/-</sup> mice fed HFD for 4 weeks. **(A-C)** No differences were observed in food ingestion and circadian rhythm **(A)**, respiratory exchange ratio, oxygen consumption, carbon dioxide production, energy expenditure or energy balance **(B)** between WT mice and MΦ EGFR<sup>-/-</sup> mice although there was trend for increased ambulatory/pedestrian locomotion, locomotor activity, and distance in cage locomotor in the MΦ EGFR<sup>-/-</sup> mice **(C)**. Shaded areas indicate the dark photoperiod. Data are presented by mean  $\pm$  SEM; by 2-way ANOVA followed by Bonferroni's post hoc test, n=8 in each group. **(D)** Regression plot of food consumption, oxygen consumption, energy expenditure, and carbon dioxide production vs. lean mass. N=8, ANCOVA was used.

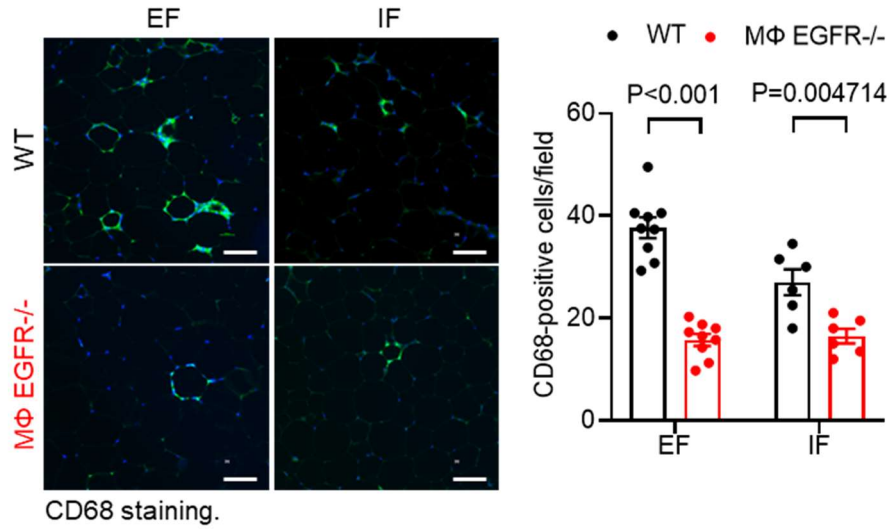

**Supplementary Figure 12. Mice with myeloid EGFR deletion had fewer ATMs in diet-induced obesity.** Male WT and myeloid EGFR<sup>-/-</sup> mice were fed the HFD for 12 weeks. CD68 immunofluorescent staining showed that myeloid EGFR<sup>-/-</sup> mice had decreased ATMs in both EF and IF. N=6. Scale bar=100μm.

Data are means ± SEM, analyzed using 2-way ANOVA followed by Bonferroni's post hoc test.



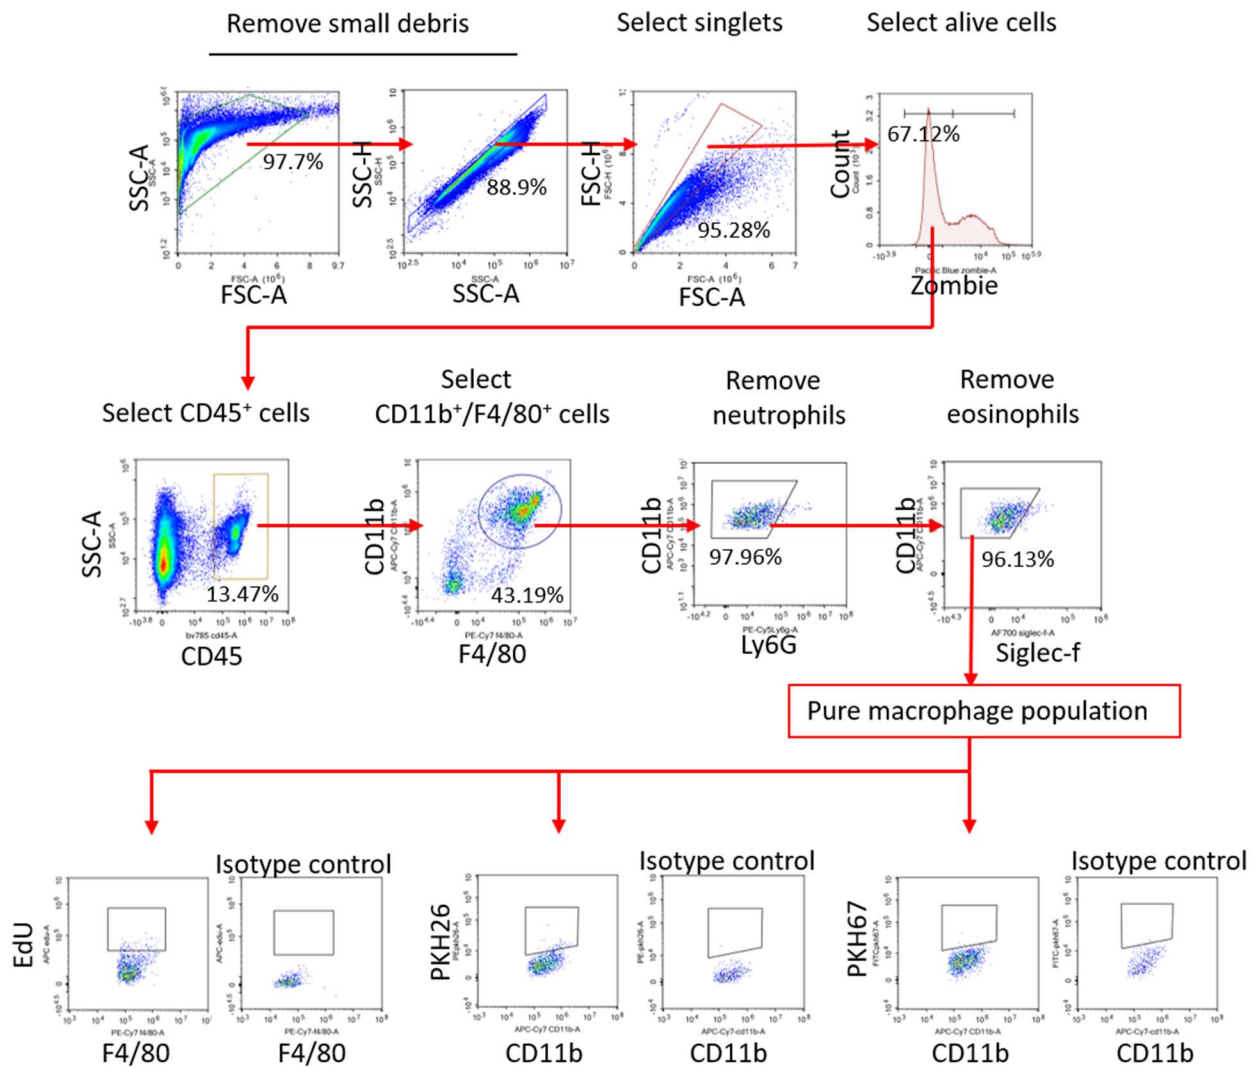

**Supplementary Figure 13. Gating strategy of Figure 7B for epididymal fat tissue ATM population, monocyte recruitment, and ATM proliferation analysis.**

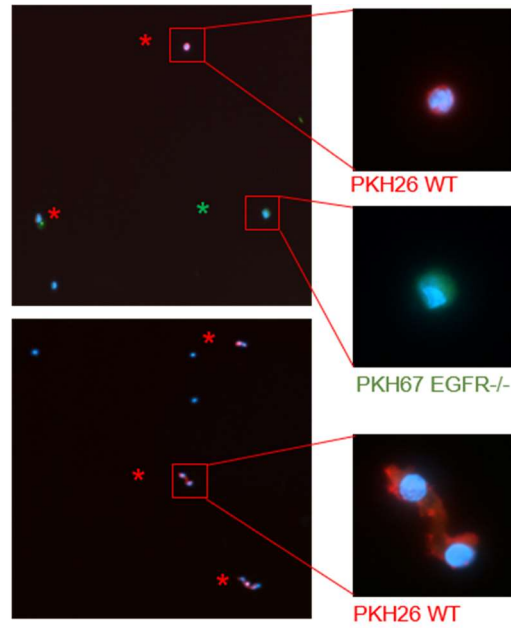

**Supplementary Figure 14. Bone marrow derived monocyte (BMDMs) with EGFR deletion had impaired recruitment in WT mice in diet-induced obesity.** WT BMDMs were labeled with the monocyte tracking dye PKH26 (red) and EGFR<sup>-/-</sup> BMDMs with PKH67 (green) and injected a mixture containing equal amounts of labeled WT and EGFR<sup>-/-</sup> BMDMs into WT recipients fed the HFD for 6 weeks. More PKH26-positive WT BMDMs were also observed in cell suspension smears of EF from WT recipients (representative of 3 independent experiments).

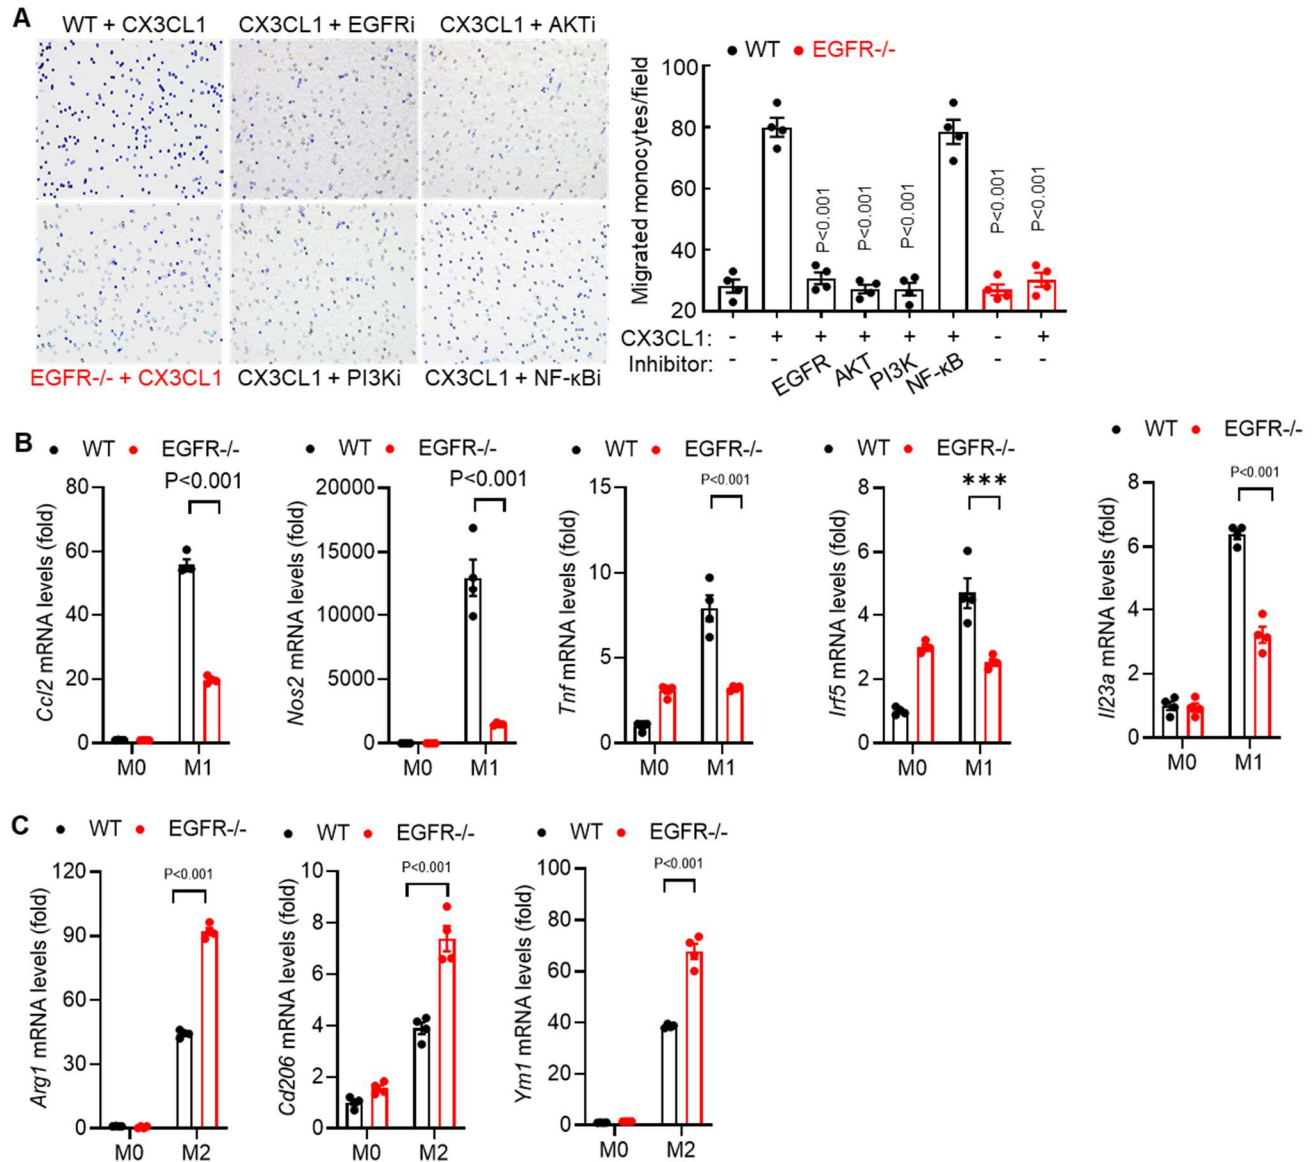

**Supplementary Figure 15. EGFR signaling regulated BMDM migration and polarization.** BMDMs were isolated from WT and M $\Phi$  EGFR<sup>-/-</sup> mice. **(A)** Chemoattractant CX3CR1-induced migration in WT BMDMs was blocked by an EGFR inhibitor (erlotinib), an AKT inhibitor (MK-2206), a PI3K inhibitor (BEZ235) or EGFR deletion. N=4. **(B and C)** EGFR<sup>-/-</sup> BMDMs had lower proinflammatory M1/Th1 cytokines/chemokines with LPS/IFN- $\gamma$ -mediated M1 polarization, including *Ccl2*, *Nos2*, *Tnf*, and *I23a* **(B)** but higher anti-inflammatory cytokines with IL-4/IL-13-mediated M2 polarization, including *Arg1*, *Cd206*, and *Ym1* **(C)**. N = 4 in each group.

Data are means  $\pm$  SEM, analyzed using 2-way ANOVA followed by Bonferroni's post hoc test for all.

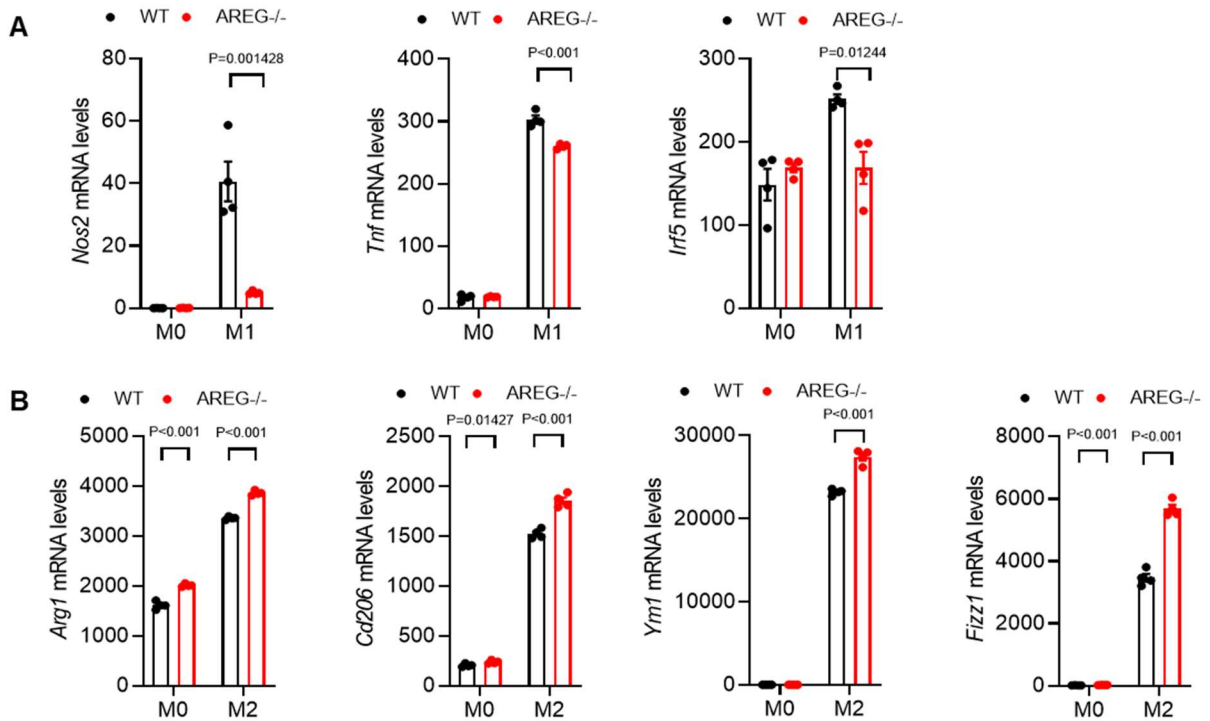

**Supplementary Figure 16. AREG regulated BMDM polarization.** BMDMs were isolated from WT and global AREG<sup>-/-</sup> mice. (A and B) AREG<sup>-/-</sup> BMDMs had lower proinflammatory M1/Th1 cytokines/chemokines with LPS/IFN- $\gamma$ -mediated M1 polarization, including *Nos2*, *Tnf*, and *Irf5* (A) but higher anti-inflammatory cytokines with IL-4/IL-13-mediated M2 polarization, including *Arg1*, *Cd206*, *Fizz1*, and *Ym1* (D). N = 4 in each group.

Data are means  $\pm$  SEM, analyzed using 2-way ANOVA followed by Bonferroni's post hoc test for all.

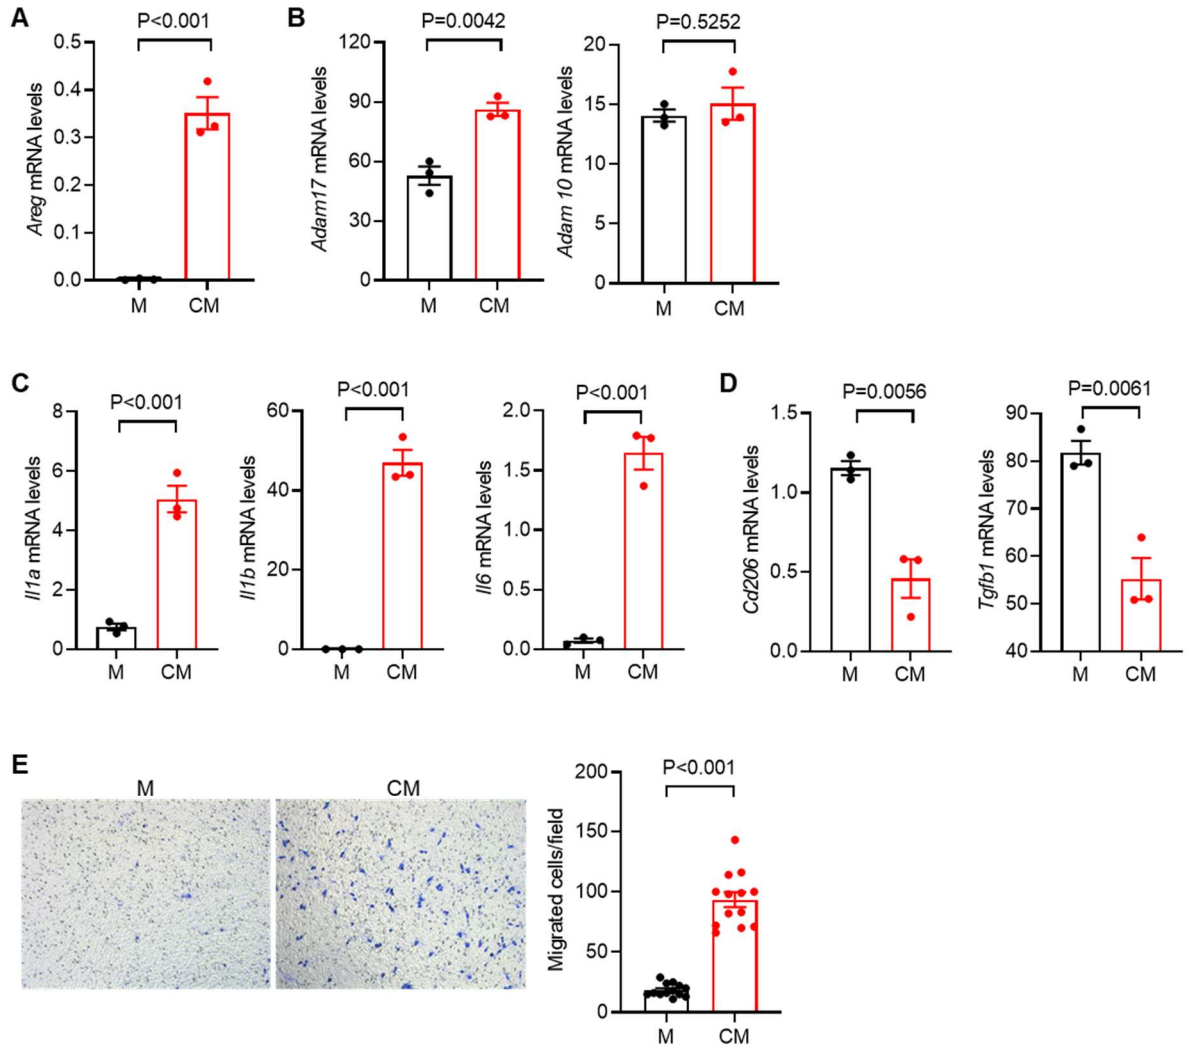

**Supplementary Figure 17. Adipocytes regulated macrophage properties.** Apoptotic 3T3-L1 cell differentiated adipocytes and mouse macrophage-like RAW264.7 cells were used. **(A-D)** Compared to serum-free medium (M), conditional serum-free medium (CM) from apoptotic adipocytes stimulated RAW264.7 cell mRNA expression of *Areg* **(A)**, *Adam17* **(B)**, proinflammatory cytokines including *Il1a*, *Il1b*, and *Il6* **(C)**, and inhibited antiinflammatory *Cd206* and *Tgfb* **(D)**. N=3. **(E)** Coculture with apoptotic adipocytes led to increased RAW264.7 cell migration. N=13. Data are means  $\pm$  SEM, analyzed using 2 tailed Student's t test.

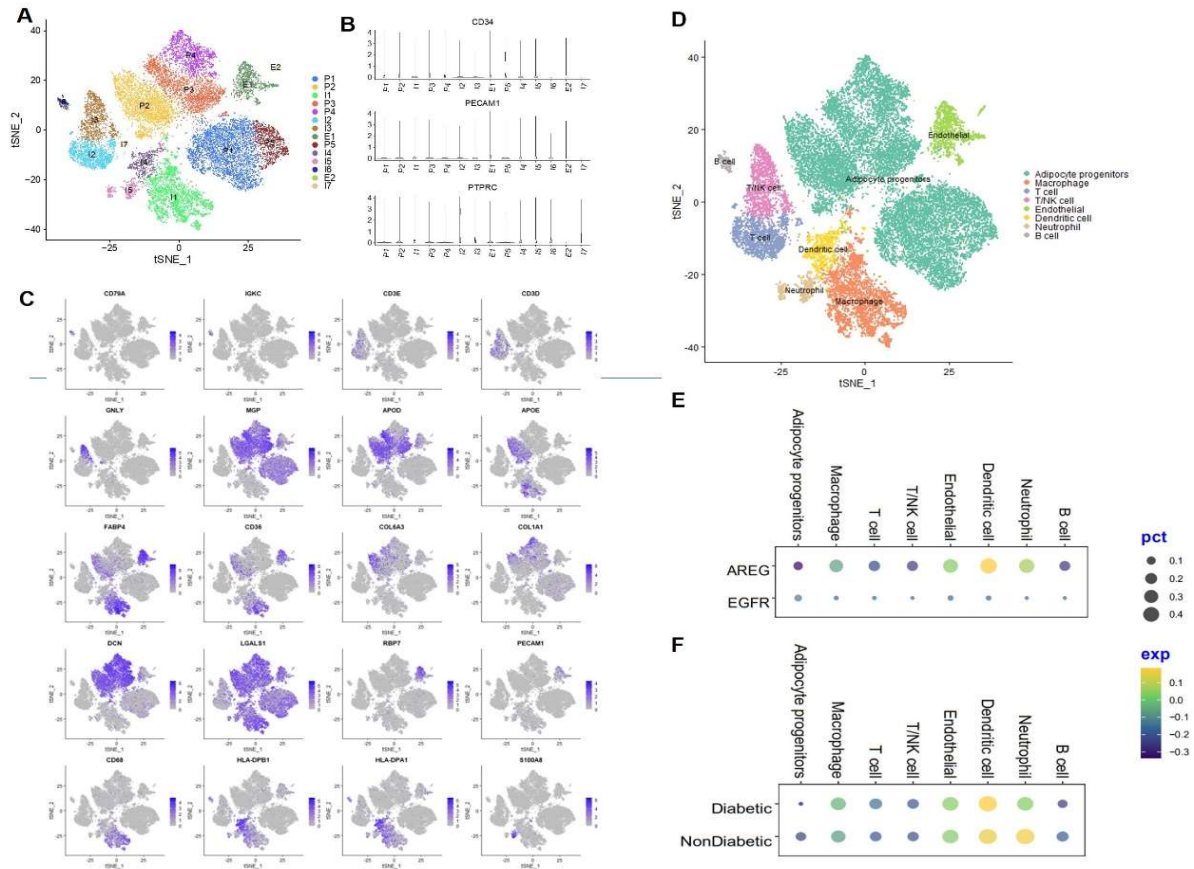

**Supplementary Figure 18.** *AREG* mRNA levels were increased in human adipose tissue macrophages and dendritic cells in individuals with type 2 diabetes. **A.** Identified cell populations in the non-adipocyte fraction of adipose tissue from database (GSE129363)<sup>27</sup>. Fourteen clusters were identified from 26,350 cells derived from SVF (stromal vascular fraction) of 25 adipose samples, including progenitors (P1–P5), immune cells (I1–I7) and endothelial cells (E1–E2). **B.** SVF-derived progenitor clusters. Violin plots of log-transformed expression density of *CD34*, *CD31/PECAM1* and *CD45/PTPRC* across all SVF clusters from 25 samples. The width of the violin plot indicates the number of cells expressing the particular gene. **C.** Cell type annotation indicated cell populations classified as immune cells. **D.** Six clusters of immune cells were identified, macrophages, T cells, T/NK cells, dendritic cells, neutrophils, and B cells. **E.** *AREG* transcripts were evident in macrophages, dendritic cells, neutrophils, and endothelial cells. **F.** Macrophage and dendritic cell *AREG* transcripts were higher in diabetic adipose tissue than in non-diabetic adipose tissue.

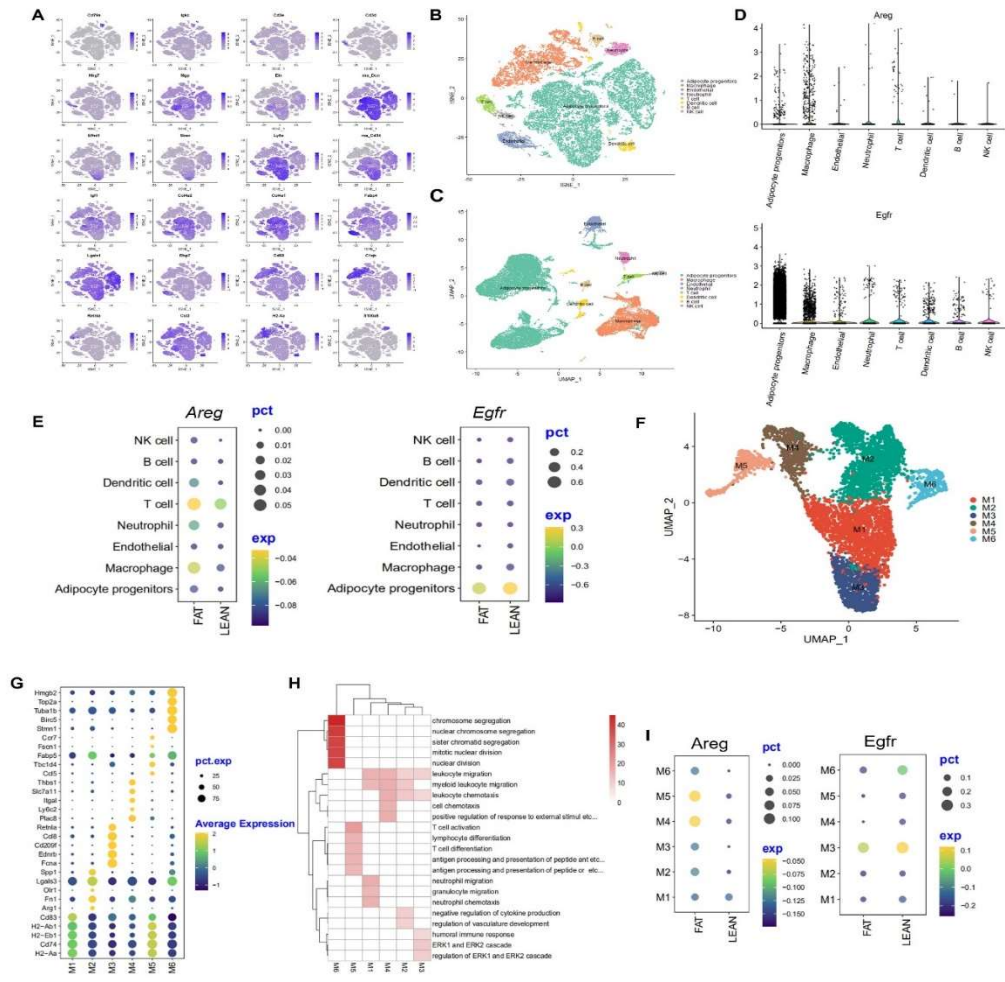

**Supplementary Figure 19.** *Areg* mRNA levels were increased in adipose tissue macrophages in high fat diet induced obese mice. **A**. Cell type annotation for cell populations from epididymal fat tissue stromal vascular fraction (SVF) of lean and fat mice from GSE16187 database<sup>28</sup>. **B**. Clustering results indicated six clusters of immune cell populations including macrophages, T cells, NK cells, dendritic cells, neutrophils, and B cells. **C**. Uniform manifold approximation and projection (UMAP) plot for unsupervised clustering of the single cells identified a total of 8 cell populations. **D**. Both *Areg* and *Egfr* transcripts were mainly expressed in adipocyte progenitors and macrophages. **E**. *Areg* transcripts were increased in macrophages, dendritic cells, neutrophils, and T cells in SVF from obese mice. There were no differences in *Egfr* transcripts between lean and obese mice. **F**. UMAP plot for unsupervised clustering of the single cells identified a total of 6 macrophage populations (M1-M6). **G**. Bubble map shows the top genes in all macrophage subgroups. **H**. Gene ontology analysis of the M1 to M6 macrophage subgroups. **I**. *Areg* transcripts were most increased in M4 and M5 subgroups in obese mice. GO analysis revealed M4 and M5 subgroups are involved in leukocyte migration and T cell activation. There were no differences in *Egfr* transcripts in macrophage subgroups between lean mice and obese mice.
